# Supplementary material for: rs495139 in the TYMS-ENOSF1 Region and Risk of Ovarian Carcinoma of Mucinous Histology
Source: MDPI journal article supplement (doi:10.3390/ijms19092473), 2018-08-21
Supplement: s1 [file s1]

**Supplemental Table 1.** Age-adjusted expression quantitative trait locus associations between rs495139 and TYMS and ENOSF1 gene expression in 316 ovarian tumors, Mayo Clinic.

| Agilent Probe | Coordinates<br>(Chr 18)* | Gene<br>region | All tumors,<br>N=316 |         | MOC,<br>N=5 |         |
|---------------|--------------------------|----------------|----------------------|---------|-------------|---------|
|               |                          |                | Beta                 | P-value | Beta        | P-value |
| A-23_P50096   | 673276-<br>673335        | TYMS           | 0.12                 | 0.12    | -0.70       | 0.45    |
| A_23_P15906   | 674217-<br>674158        | ENOSF1         | 0.17                 | 0.03    | 0.08        | 0.94    |
| A-23_P4503    | 688576-<br>685952        | ENOSF1         | 0.15                 | 0.05    | 0.87        | 0.32    |

\* Human genome reference build 37

**Supplemental Table 2.** Contributing studies of invasive ovarian cancer cases and controls of European ancestry, OCAC<sup>a</sup>

| OCAC Study Name                                                               | Study Abbrev. | Analysis Set | Study Location                                                                                                    | Study Design                          | Controls     | All cases    | Mucinous cases |
|-------------------------------------------------------------------------------|---------------|--------------|-------------------------------------------------------------------------------------------------------------------|---------------------------------------|--------------|--------------|----------------|
| <b>Discovery set</b>                                                          |               |              |                                                                                                                   |                                       |              |              |                |
| Australian Ovarian Cancer Study                                               | AOC           | AUS          | Australia                                                                                                         | Population-based/ case control        | 1059         | 717          | 23             |
| Diseases of the Ovary and their Evaluation                                    | DOV           | DOV          | USA: 13 counties in western Washington state                                                                      | Population-based/ case control        | 709          | 526          | 19             |
| German Ovarian Cancer Study                                                   | GER           | GER          | Germany: two geographical regions in the states of Baden-Württemberg and Rhineland-Palatinate in southern Germany | Population-based/ case control        | 348          | 197          | 22             |
| Hawaii Ovarian Cancer Case-Control Study                                      | HAW           | HAW          | USA: Hawaii                                                                                                       | Population-based/ case control        | 157          | 70           | 2              |
| Novel Risk Factors and Potential Early Detection Markers for Ovarian Cancer   | HOP           | HOP          | USA: western PA, northeastern Ohio, western New York                                                              | Population-based/ case control        | 631          | 278          | 13             |
| Mayo Clinic Ovarian Cancer Case-Control Study                                 | MAY           | MAY          | USA: North-Central (MN, SD, ND, IL, IA, WI)                                                                       | Clinic-based/ case control            | 388          | 303          | 8              |
| North Carolina Ovarian Cancer Study                                           | NCO           | NCO          | USA: central and eastern North Carolina (48 counties)                                                             | Population-based/ case control        | 718          | 567          | 27             |
| New England Case Control Study                                                | NEC           | NEC          | USA: New Hampshire and eastern Massachusetts                                                                      | Population-based/ case control        | 916          | 512          | 33             |
| Nurses' Health Study                                                          | NHS           | NHS          | USA: National                                                                                                     | Population-based/ Nested case control | 355          | 109          | 7              |
| Study of Epidemiology and Risk Factors in Cancer Heredity                     | SEA           | SEA          | UK: East Anglia and West Midlands                                                                                 | Population-based/ case control        | 1,212        | 523          | 98             |
| Family Registry for Ovarian Cancer and Genetic Epidemiology of Ovarian Cancer | STA           | STA          | USA: Six counties in the San Francisco Bay area                                                                   | Population-based/ Case control        | 363          | 247          | 23             |
| University of California Irvine Ovarian Study                                 | UCI           | UCI          | USA: Southern California (Orange and San-Diego, Imperial Counties)                                                | Population-based/ Case control        | 425          | 284          | 18             |
| United Kingdom Ovarian Cancer Population Study                                | UKO           | UKO          | UK: England, Wales and Northern Ireland                                                                           | Population-based/ Case control        | 564          | 244          | 28             |
| Los Angeles County Case-Control studies of Ovarian Cancer-1                   | USC           | USC          | USA: Los Angeles County, California                                                                               | Population-based/ Case control        | 565          | 404          | 33             |
| <b>Total</b>                                                                  |               |              |                                                                                                                   |                                       | <b>8,410</b> | <b>4,981</b> | <b>354</b>     |

| OCAC Study Name                                                             | Study Abbrev. | Analysis Set | Study Location                                                                                                    | Study Design                   | Controls | All cases | Mucinous cases |
|-----------------------------------------------------------------------------|---------------|--------------|-------------------------------------------------------------------------------------------------------------------|--------------------------------|----------|-----------|----------------|
| <b>iCOGS set</b>                                                            |               |              |                                                                                                                   |                                |          |           |                |
| Australian Cancer Study (Ovarian Cancer)                                    | ACS           | AUS          | Australia                                                                                                         | Population-based/ case control | 28       | 31        | 2              |
| Australian Ovarian Cancer Study                                             | AOC           | AUS          | Australia                                                                                                         | Population-based/ case control | 105      | 272       | 14             |
| Bavarian Ovarian Cancer Cases and Controls                                  | BAV           | BAV          | Southeast Germany                                                                                                 | Population-based/ case control | 143      | 93        | 8              |
| Belgian Ovarian Cancer Study                                                | BEL           | BEL          | Belgium, University Hospital Leuven                                                                               | Hospital based/ Case control   | 1,349    | 269       | 23             |
| Danish Pelvic Mass Study                                                    | PVD           | DAN          | Denmark                                                                                                           | Case only                      | 0        | 169       | 10             |
| Malignant Ovarian Cancer                                                    | MAL           | DAN          | Denmark                                                                                                           | Population-based/ Case control | 828      | 440       | 42             |
| Diseases of the Ovary and their Evaluation                                  | DOV           | DOV          | USA: 13 counties in western Washington state                                                                      | Population-based/ case control | 815      | 405       | 8              |
| Oregon Ovarian Cancer Registry                                              | ORE           | DOV          | USA: Portland, Oregon                                                                                             | Case only                      | 0        | 55        | 2              |
| German Ovarian Cancer Study                                                 | GER           | GER          | Germany: two geographical regions in the states of Baden-Württemberg and Rhineland-Palatinate in southern Germany | Population-based/ case control | 76       | 8         | 1              |
| Dr. Horst Schmidt Kliniken                                                  | HSK           | GER          | Germany                                                                                                           | Case only                      | 0        | 144       | 1              |
| Hawaii Ovarian Cancer Case-Control Study                                    | HAW           | HAW          | USA: Hawaii                                                                                                       | Population-based/ case control | 17       | 9         | 1              |
| Hannover-Jena Ovarian Cancer Study                                          | HJO           | HJO          | Germany                                                                                                           | Hospital based/ Case control   | 273      | 255       | 8              |
| Hannover-Minsk Ovarian Cancer Study                                         | HMO           | HMO          | Belarus                                                                                                           | Case control                   | 138      | 143       | 7              |
| Helsinki Ovarian Cancer Study                                               | HOC           | HOC          | Helsinki, Finland                                                                                                 | Case control                   | 445      | 213       | 45             |
| Gilda Radner Familial Ovarian Cancer Registry                               | GRR           | HPE          | USA: National                                                                                                     | Familial cancer/ Case only     | 0        | 110       | 5              |
| Novel Risk Factors and Potential Early Detection Markers for Ovarian Cancer | HOP           | HPE          | USA: Western PA, Northeastern Ohio, Western New York                                                              | Population-based/ Case control | 888      | 374       | 17             |
| Women's Cancer Program                                                      | LAX           | LA2          | USA: Southern California                                                                                          | Case only                      | 0        | 272       | 12             |

| OCAC Study Name                                                               | Study Abbrev. | Analysis Set | Study Location                                        | Study Design                          | Controls | All cases | Mucinous cases |
|-------------------------------------------------------------------------------|---------------|--------------|-------------------------------------------------------|---------------------------------------|----------|-----------|----------------|
| at the Samuel Oschin Comprehensive Cancer Institute                           |               |              |                                                       |                                       |          |           |                |
| Los Angeles County Case-control studies of Ovarian Cancer-1                   | USC           | LA2          | USA: Los Angeles County, California                   | Population-based/ Case control        | 626      | 394       | 21             |
| Mayo Clinic Ovarian Cancer Case-Control Study                                 | MAY           | MAY          | USA: North Central (MN, SD, ND, IL, IA, WI)           | Clinic based/ Case control            | 379      | 414       | 11             |
| Melbourne Collaborative Cohort Study                                          | MCC           | MCC          | Melbourne, Australia                                  | Cohort/ Nested case control           | 66       | 63        | 7              |
| MD Anderson Ovarian Cancer Study                                              | MDA           | MDA          | USA: Texas                                            | Hospital based/ Case control          | 384      | 313       | 27             |
| Memorial Sloan–Kettering Cancer Center                                        | MSK           | MSK          | USA: New York City                                    | Case control                          | 593      | 454       | 0              |
| North Carolina Ovarian Cancer Study                                           | NCO           | NCO          | USA: Central and eastern North Carolina (48 counties) | Population-based/ Case control        | 127      | 214       | 16             |
| New England Case-Control Study                                                | NEC           | NEC          | USA: New Hampshire and Eastern Massachusetts          | Population-based/ Case control        | 206      | 226       | 14             |
| Nurses’ Health Study                                                          | NHS           | NHS          | USA: National                                         | Population-based/ Nested case control | 69       | 16        | 0              |
| New Jersey Ovarian Cancer Study                                               | NJO           | NJO          | USA: New Jersey (six counties)                        | Case control                          | 181      | 168       | 7              |
| University of Bergen, Haukeland University Hospital, Norway                   | NOR           | NOR          | Norway                                                | Case control                          | 371      | 227       | 15             |
| Nijmegen Ovarian Cancer Study                                                 | NTH           | NTH          | Eastern part of the Netherlands                       | Case control                          | 323      | 255       | 33             |
| Ovarian Cancer in Alberta and British Columbia                                | OVA           | OVA          | Alberta and British Columbia, Canada                  | Case control                          | 748      | 605       | 26             |
| Polish Ovarian Cancer Study                                                   | POC           | POC          | Poland: Szczecin, Poznan, Opole, Rzeszów              | Case control                          | 417      | 421       | 33             |
| Polish Ovarian Cancer Case-Control Study                                      | POL           | POL          | Poland: Warsaw, and Lodz                              | Population-based/ Case control        | 223      | 236       | 17             |
| Study of Epidemiology and Risk Factors in Cancer Heredity                     | SEA           | SEA          | UK: East Anglia and West Midlands                     | Population-based/ Case control        | 4,846    | 808       | 78             |
| Family Registry for Ovarian Cancer and Genetic Epidemiology of Ovarian Cancer | STA           | STA          | USA: Six counties in the San Francisco Bay area       | Population-based/ Case control        | 6        | 40        | 1              |
| Toronto Ovarian Cancer Study                                                  | TOR           | TOR          | Canada: Province of Ontario                           | Population-based                      | 440      | 557       | 39             |
| University of California                                                      | UCI           | UCI          | USA: Southern California                              | Population-                           | 41       | 67        | 4              |

| OCAC Study Name                                | Study Abbrev. | Analysis Set | Study Location                                                                             | Study Design                   | Controls      | All cases     | Mucinous cases |
|------------------------------------------------|---------------|--------------|--------------------------------------------------------------------------------------------|--------------------------------|---------------|---------------|----------------|
| Irvine Ovarian Study                           |               |              | (Orange and San-Diego, Imperial Counties)                                                  | based/ Case control            |               |               |                |
| Royal Marsden Hospital Ovarian Cancer Study    | RMH           | UK2          | UK: London                                                                                 | Hospital-based/ case only      | 0             | 145           | 16             |
| Southampton Ovarian Cancer Study               | SOC           | UK2          | UK: Wessex region                                                                          | Case only/ hospital-based      | 0             | 266           | 33             |
| Scottish Randomised Trial in Ovarian Cancer    | SRO           | UK2          | UK: coordinated through clinical trials unit, Glasgow UK from patients recruited worldwide | Case only/ clinical trial      | 0             | 152           | 3              |
| United Kingdom Ovarian Cancer Population Study | UKO           | UK2          | UK: England, Wales, and Northern Ireland                                                   | Population-based/ Case control | 586           | 470           | 49             |
| UK Familial Ovarian Cancer Registry            | UKR           | UK2          | UK: National                                                                               | Case only/ familial register   | 0             | 47            | 3              |
| Warsaw Ovarian Cancer Study                    | WOC           | WOC          | Poland: Warsaw and central Poland                                                          | Case control                   | 204           | 200           | 8              |
| <b>Total</b>                                   |               |              |                                                                                            |                                | <b>15,941</b> | <b>10,019</b> | <b>667</b>     |
| <b>Overall Total</b>                           |               |              |                                                                                            |                                | <b>24,351</b> | <b>15,000</b> | <b>1,021</b>   |

<sup>a</sup>Ovarian Cancer Association Consortium

Esophagus\_Mucosa eQTL 18\_676008\_G\_C\_b37 ENSG00000132199.14

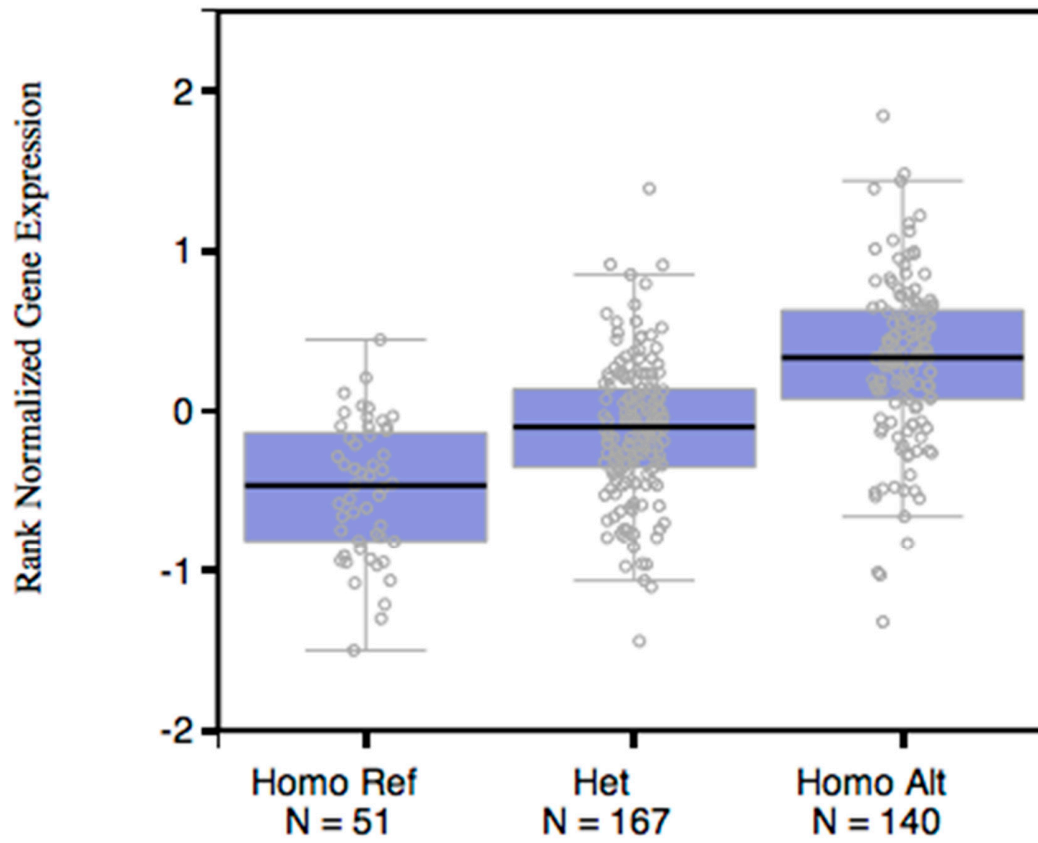

**Supplemental Figure 1.** Correlation between rs495139 and ENOSF1 mRNA expression in normal esophageal mucosa from the Genotype-Tissue Expression project.

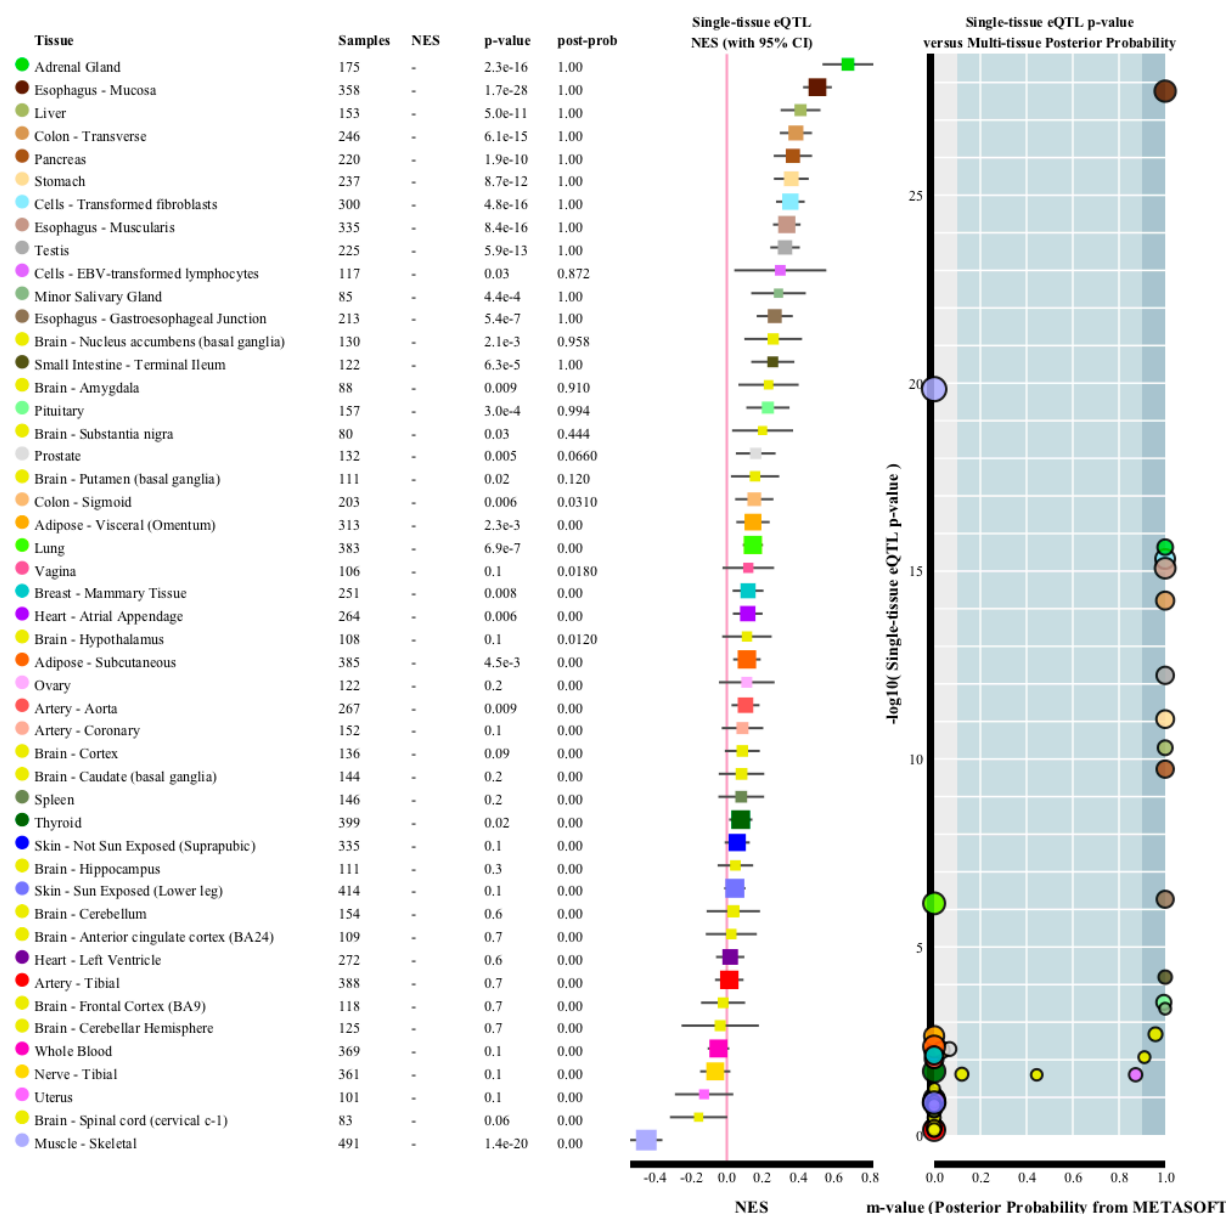

**Supplemental Figure 2.** P values for expression quantitative trait locus analysis between rs495139 and ENOSF1 mRNA expression in different tissues in the Genotype-Tissue Expression project.
